# Supplementary material
Source: PubMed Central journal article supplement (PMC6233875)
Supplement: NIHMS980547-supplement-1.pdf [file NIHMS980547-supplement-1.pdf]

# Clinically prevalent mutations in *Mycobacterium tuberculosis* alter propionate metabolism and mediate multidrug tolerance

## Supplementary Figures

### Table of Contents:

**Supplementary Figure 1:** Detailed phylogeny of Figure 1b.

**Supplementary Figure 2:** Cluster analysis of drug resistance in 549 strains from the Chinese CDC dataset.

**Supplementary Figure 3:** Regrowth of *prpR* mutants after propionate exposure

**Supplementary Figure 4:** No drug control curves corresponding to Figure 3D

**Supplementary Figure 5:** Antibiotic treatment of *prpR* strains during mouse infection

**Supplementary Figure 6:** Expression analysis of putative *prpR* targets in acetate and propionate media conditions.

**Supplementary Figure 7:** Workflow for whole-genome analysis







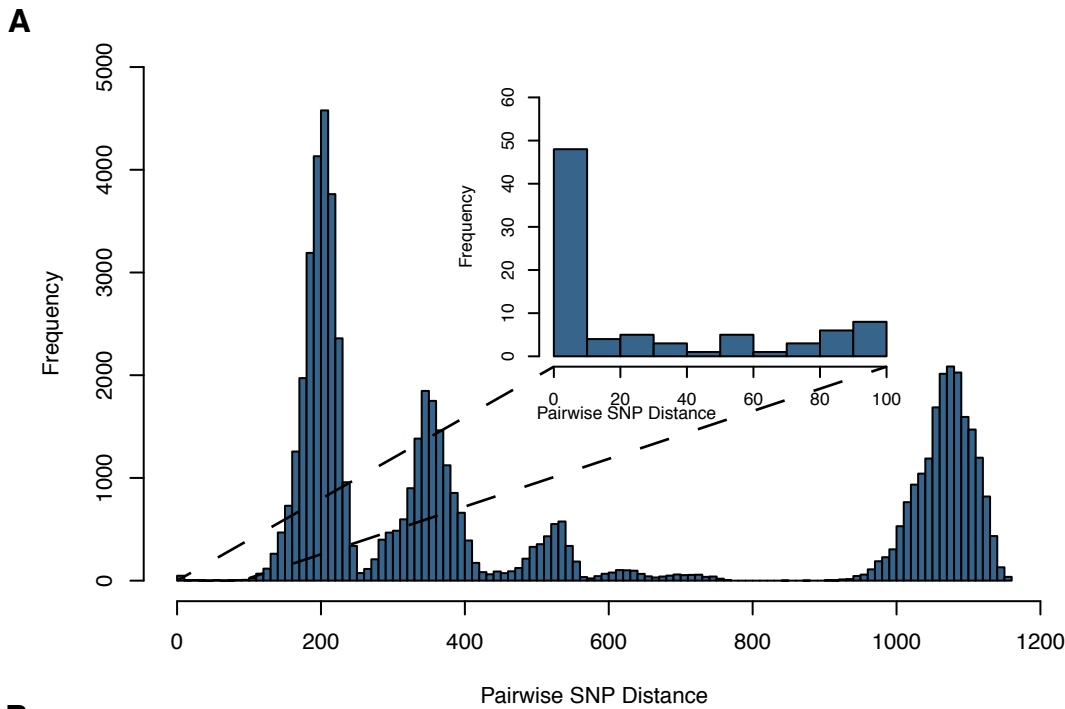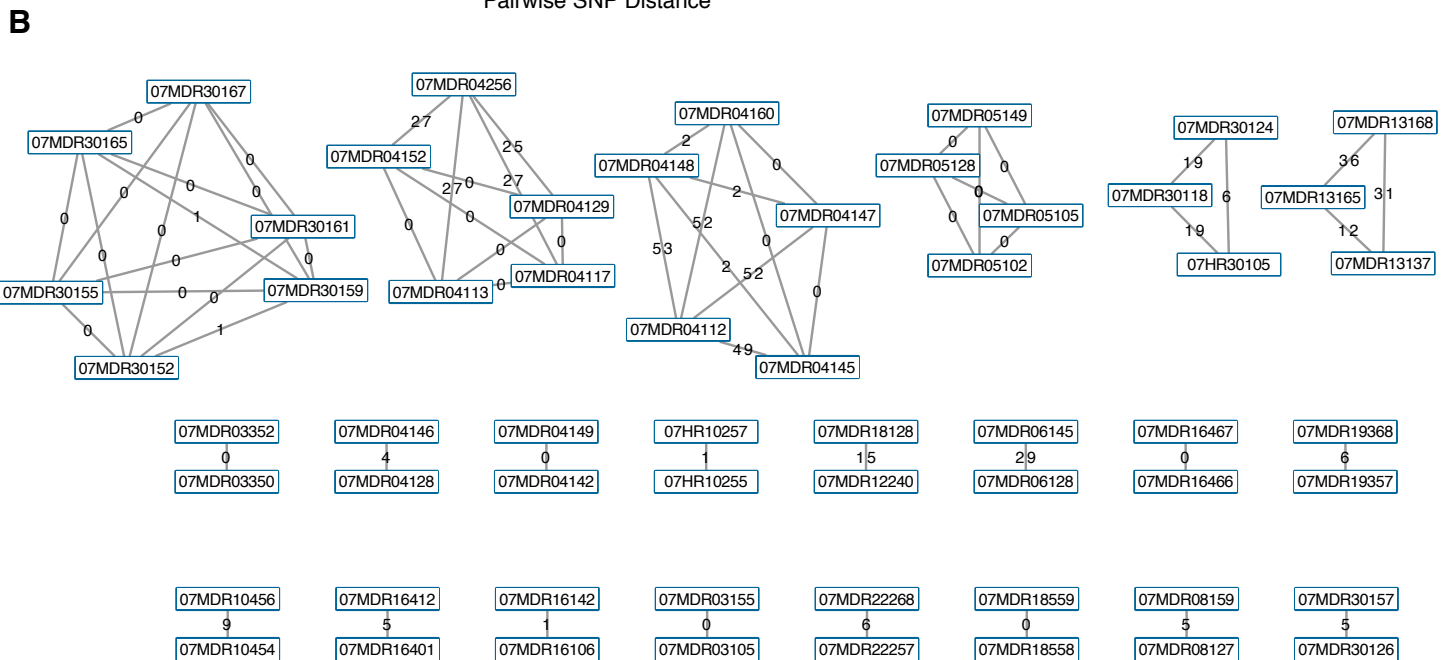

**Supplementary Figure 2.** Cluster analysis of drug resistant strains. (A) Pairwise SNP distances among all drug resistant isolates. Inset zoomed into the number of pairs with a 100 SNP threshold. (B) Networks of drug resistant clusters showing isolates as nodes and edges as pairwise distances. Isolates included within any cluster also contain the same INH resistance-determining mutation.

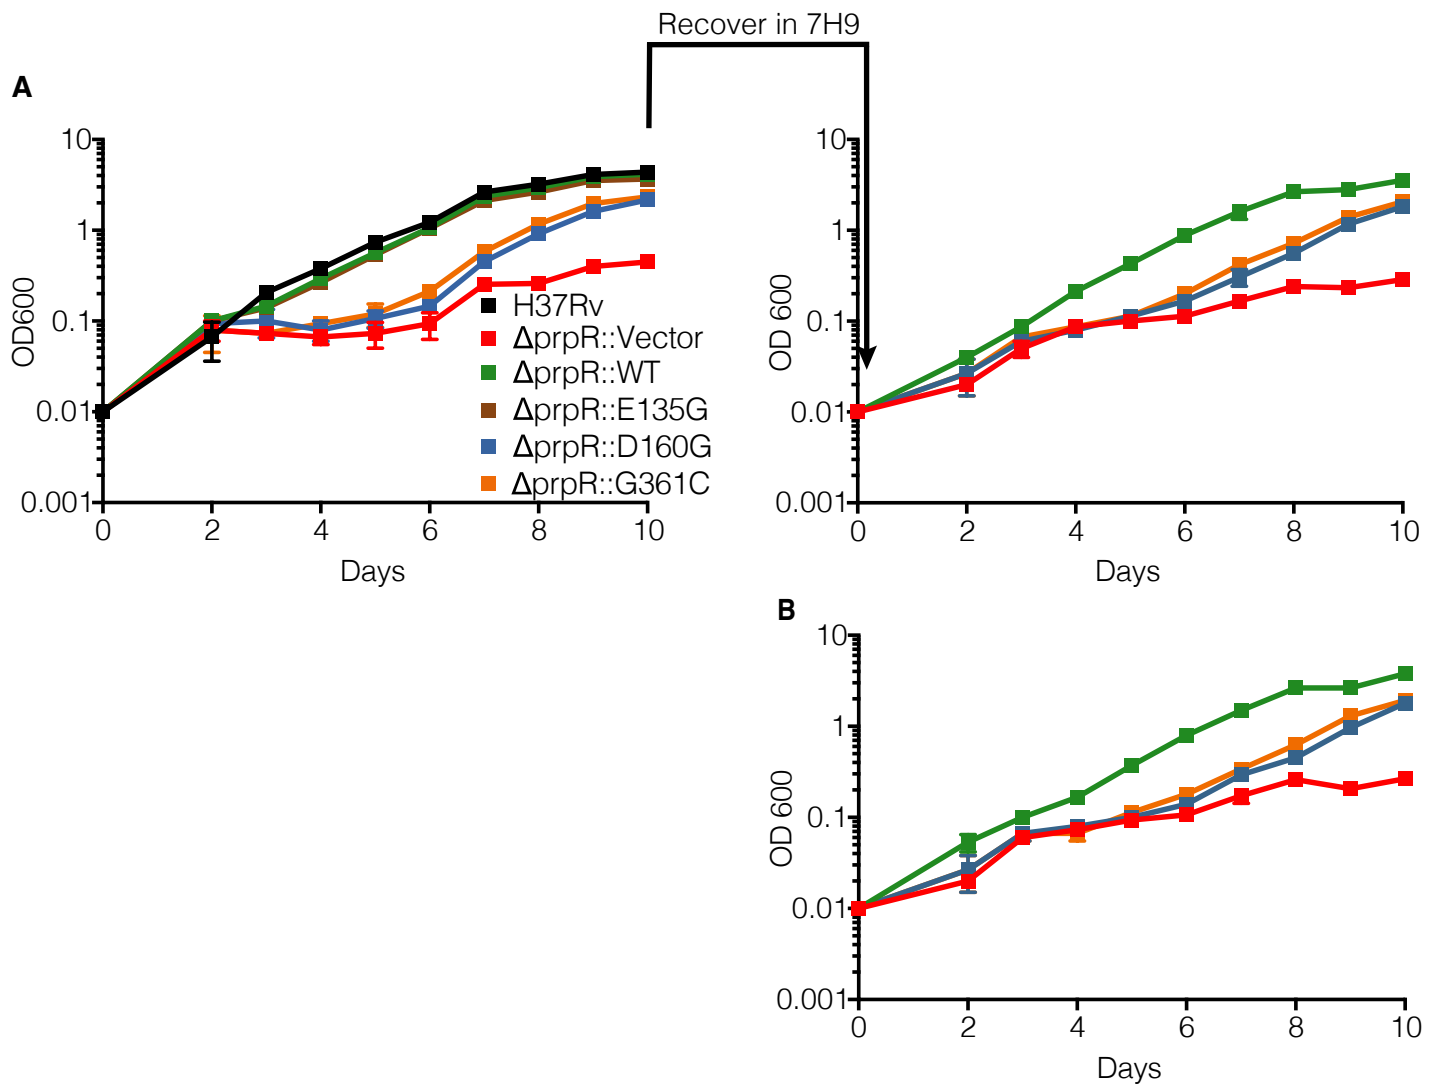

**Supplementary Figure 3.** Re-growth of *prpR* mutants after propionate exposure. (A) Strains exposed to propionate were recovered after 10 days of growth, recovered, in 7H9 OADC media for 7 days, and then re-exposed to 7H12 with propionate supplementation. (B) Growth of *prpR* mutants directly from freezer stocks in 7H12 propionate media performed concurrently with the pre-exposed strains. Data represents the mean and standard deviation of three biological replicates.

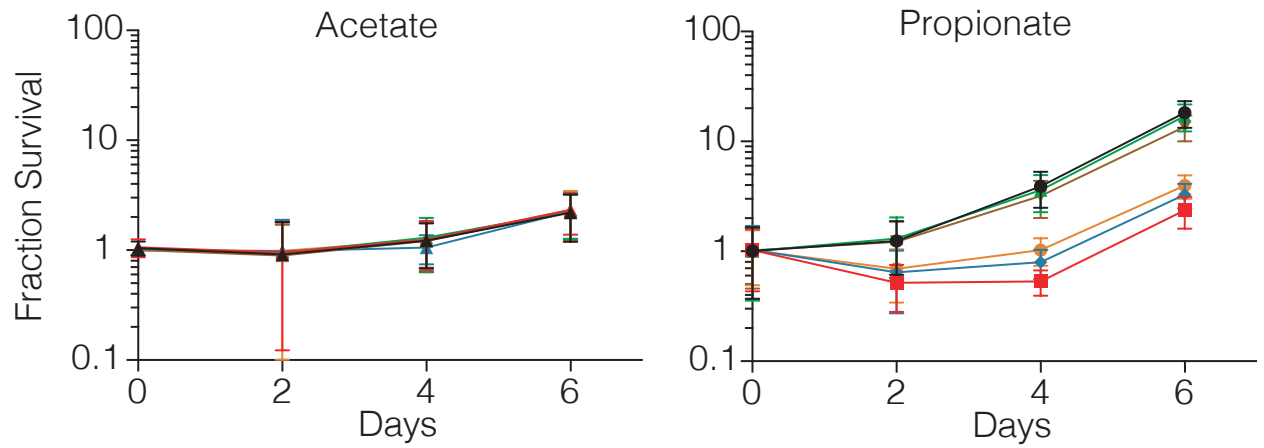

**Supplementary Figure 4.** Calculated CFU of *prpR* mutants in no drug controls corresponding to the library format antibiotic treatment depicted in Figure 3D. Data points represent the mean and standard deviation of three biological replicates.

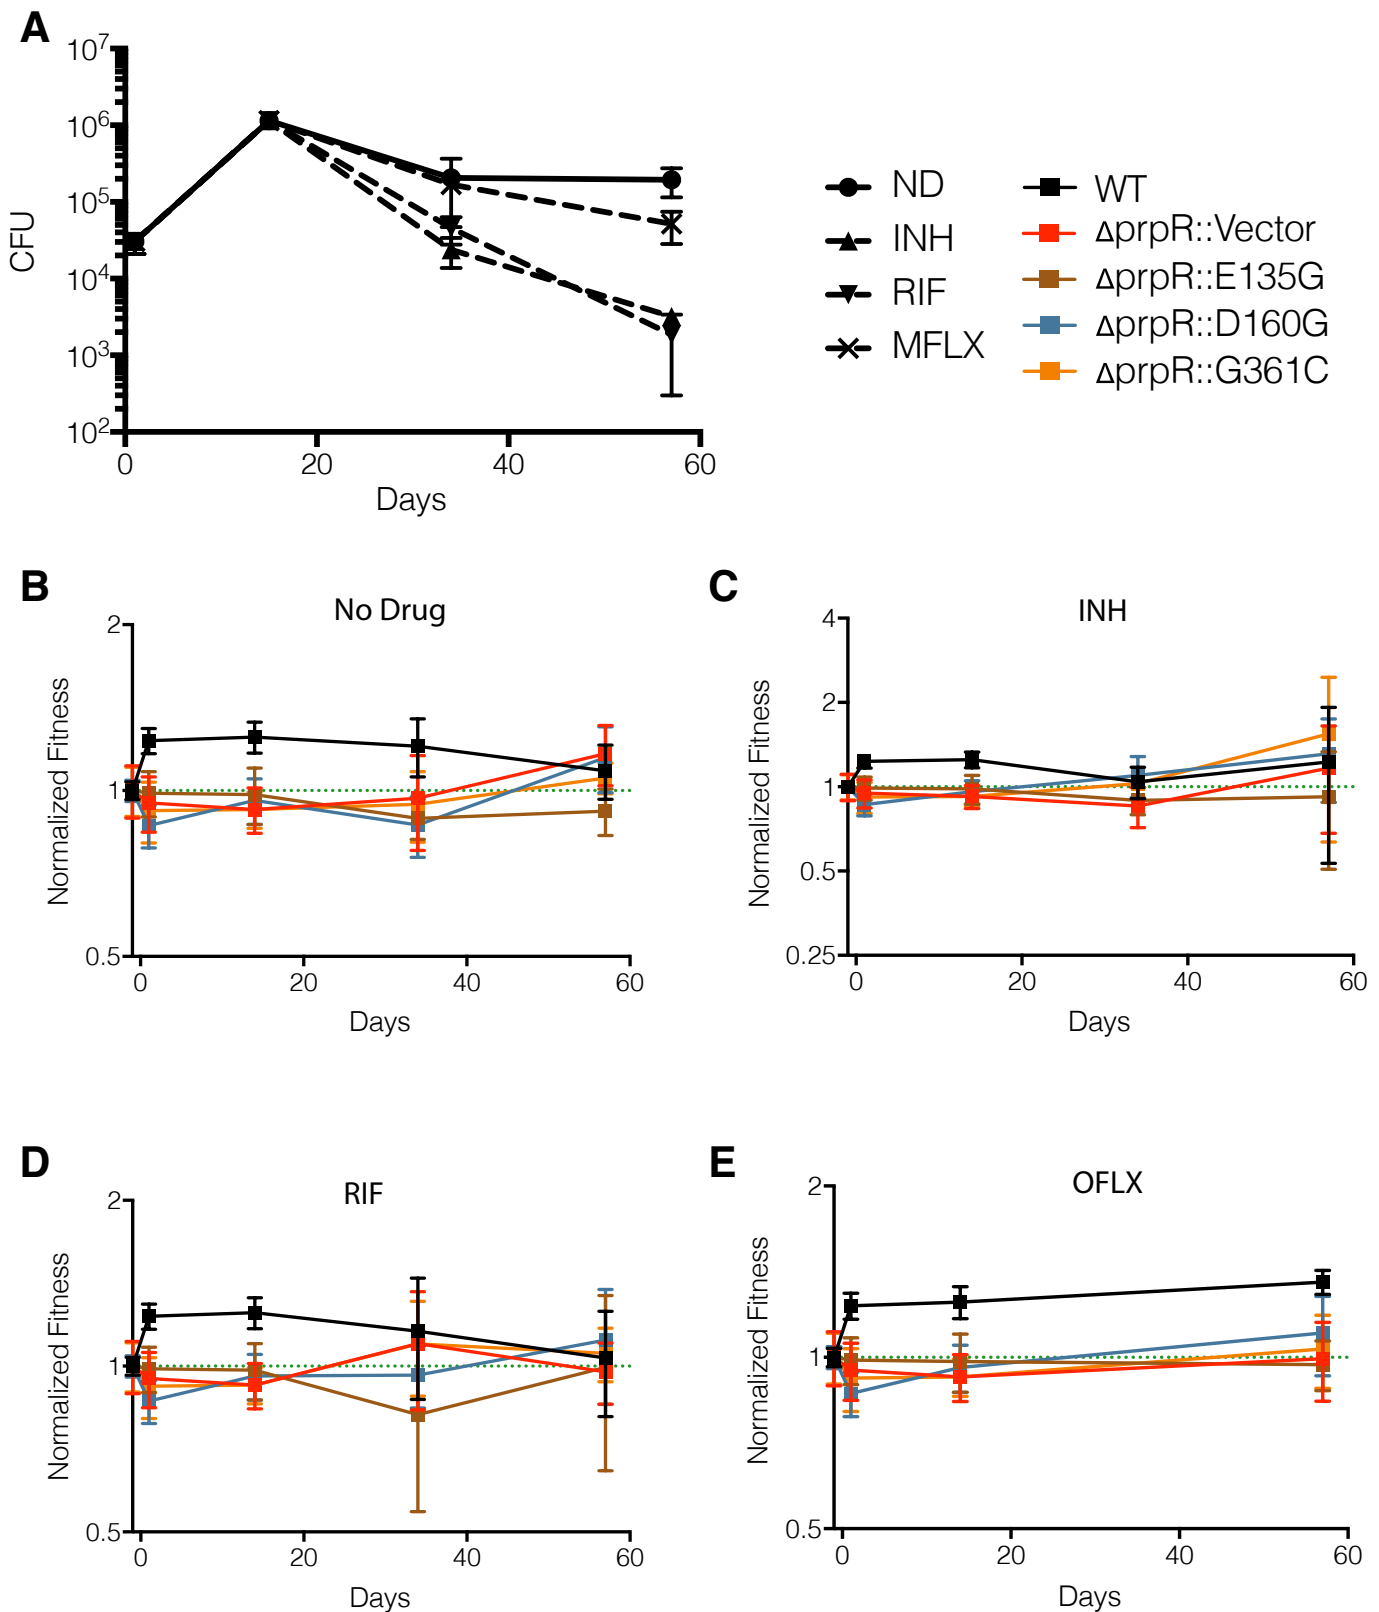

**Supplementary Figure 5.** The relative abundance of *prpR* mutants in a mouse model of infection normalized to the input library composition. (A) Infected mice were sacrificed at 1, 14, 34, and 57 days post infection and the bacterial burden was determined by plating serial dilutions of homogenized spleen samples on 7H10 agar. Antibiotic treatment was initiated at 14 days post infection. (B-E) Concurrently with CFU determination, bacteria were recovered, gDNA was extracted from >500 colonies, and the relative abundance of each strain was determined by deep sequencing. The abundance of each strain relative to  $\Delta prpR::WT$  was measured and normalized to the input library shown as day -1. The CFU and relative abundance measurement depicted is the mean of 5 mice, except the day 1 measurement, which is the mean of 3 mice. Error bars represent standard deviation.

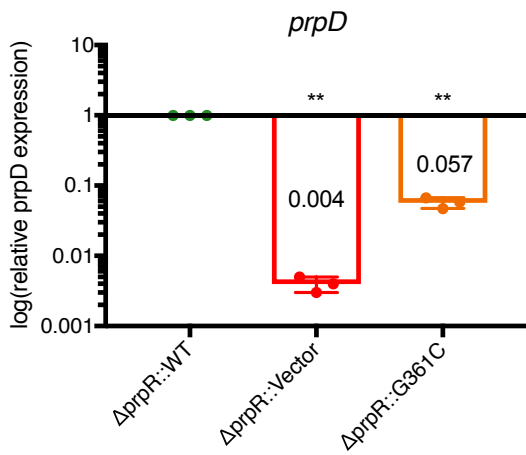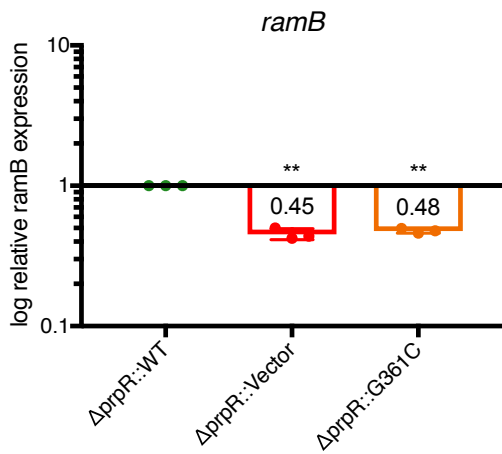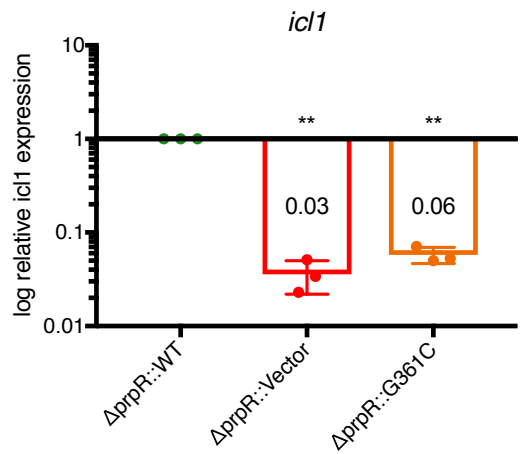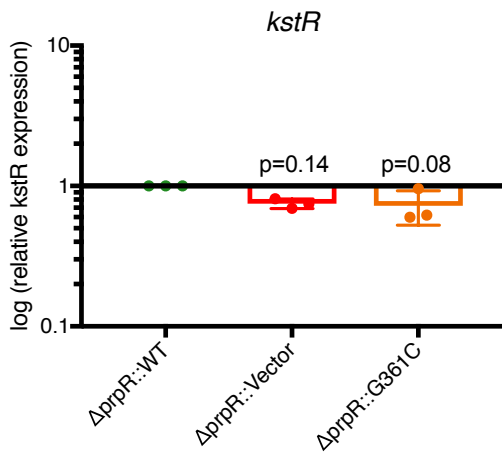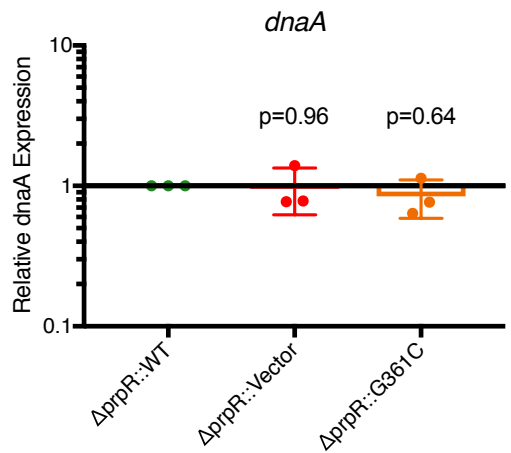

**Supplementary Figure 6.** Relative expression of a panel of proposed *prpR* targets measured by qPCR and normalized to *sigA* expression after two days of growth in 7H12 supplemented with propionate. Fold-expression is normalized to  $\Delta prpR::WT$  with error bars representing standard deviation and the decimal value of  $\Delta prpR::WT$  expression annotated within the bar. Significant differences among strains was tested by Tukey's multiple comparisons test after one-way ANOVA. \*\* signifies  $p < 0.001$ .

Supplementary Figure 7

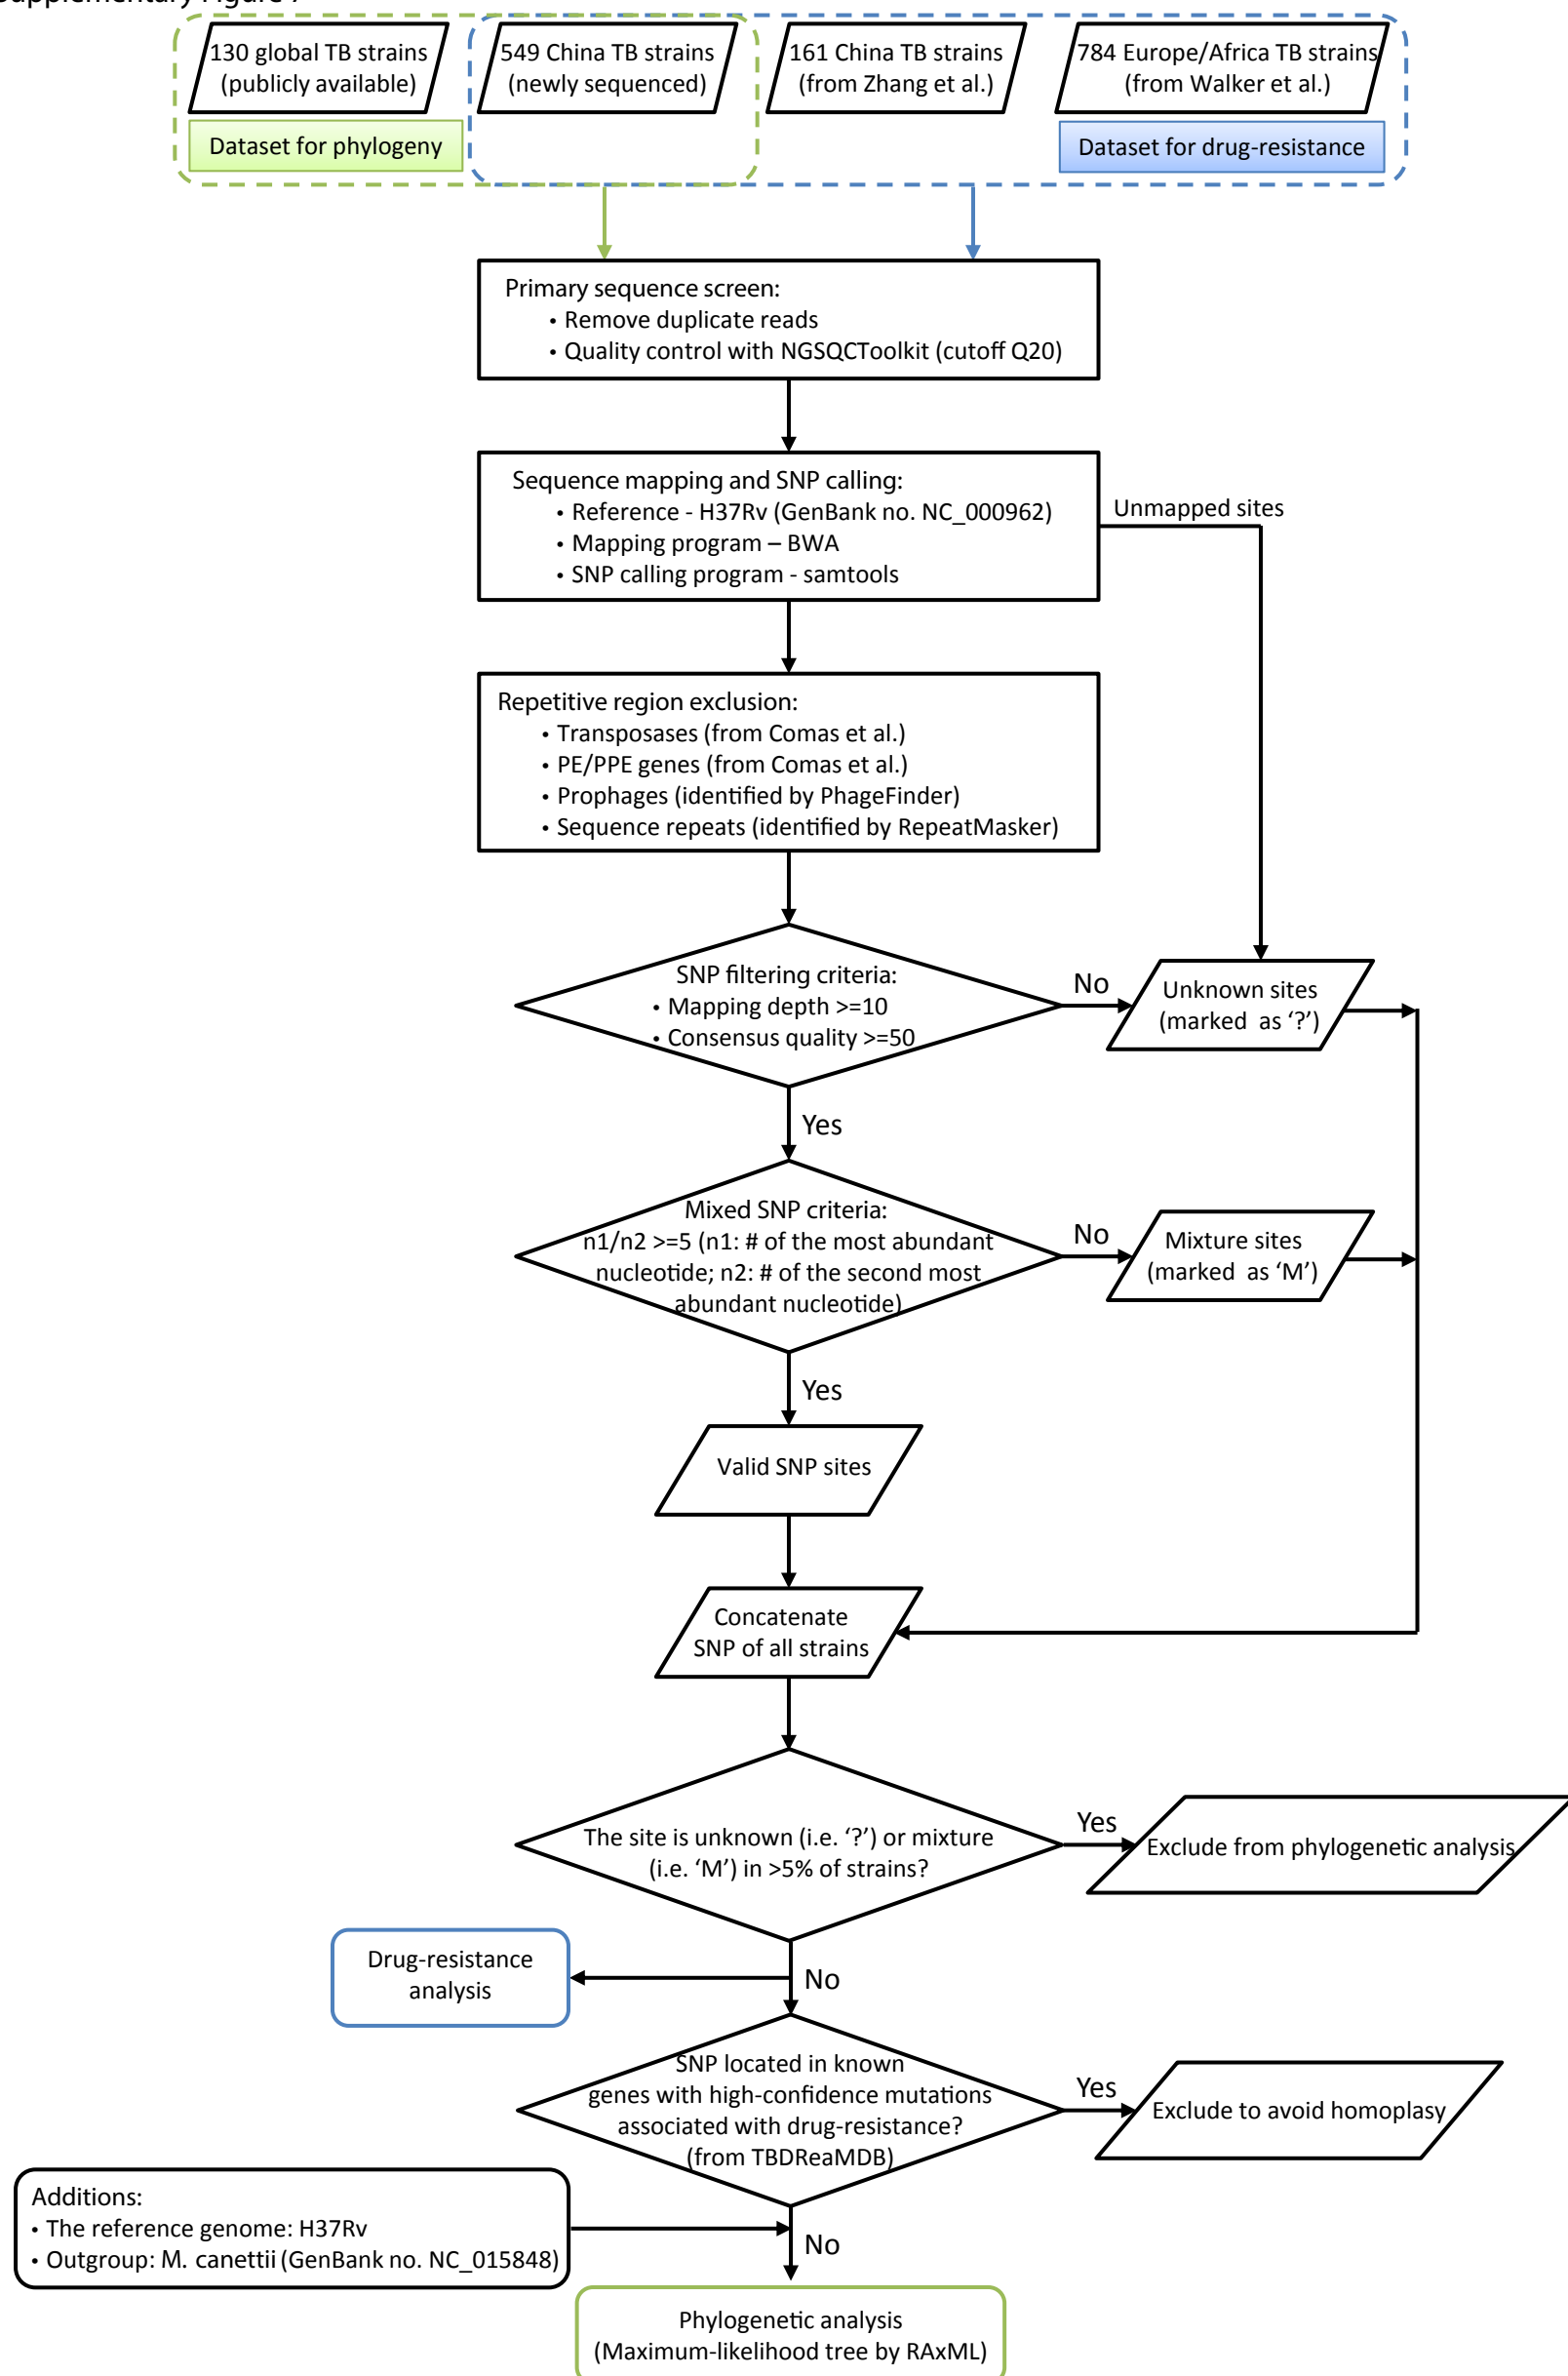

**Supplementary Figure 7.** A detailed workflow depicting the SNP calling analysis pipeline and filtering scheme for incorporation of data into each analysis.
